---

## Erratum

# University–industry collaboration within the triple helix of innovation: The importance of mutuality

**Paul Jackson<sup>\*,†</sup>, Reza Kiani Mavi<sup>\*</sup>, Yuliani Suseno<sup>\*</sup> and Craig Standing<sup>\*</sup>**

<sup>\*</sup>Centre for Innovative Practice, School of Business & Law, Edith Cowan University, 270 Joondalup Drive, Joondalup, 6027, Western Australia.

<sup>†</sup>Corresponding author. E-mail: p.jackson@ecu.edu.au

---

This article has been corrected to address an error with the corresponding author names. The correct author names are Paul Jackson, Reza Kiani Mavi, Yuliani Suseno and Craig Standing

The publisher apologizes for the error.
